# Supplementary material
Source: publisher site journal article supplement (https://www.dovepress.com/article/296373)
Supplement: Supplementary file 1 [file get_supplementary_file.php]

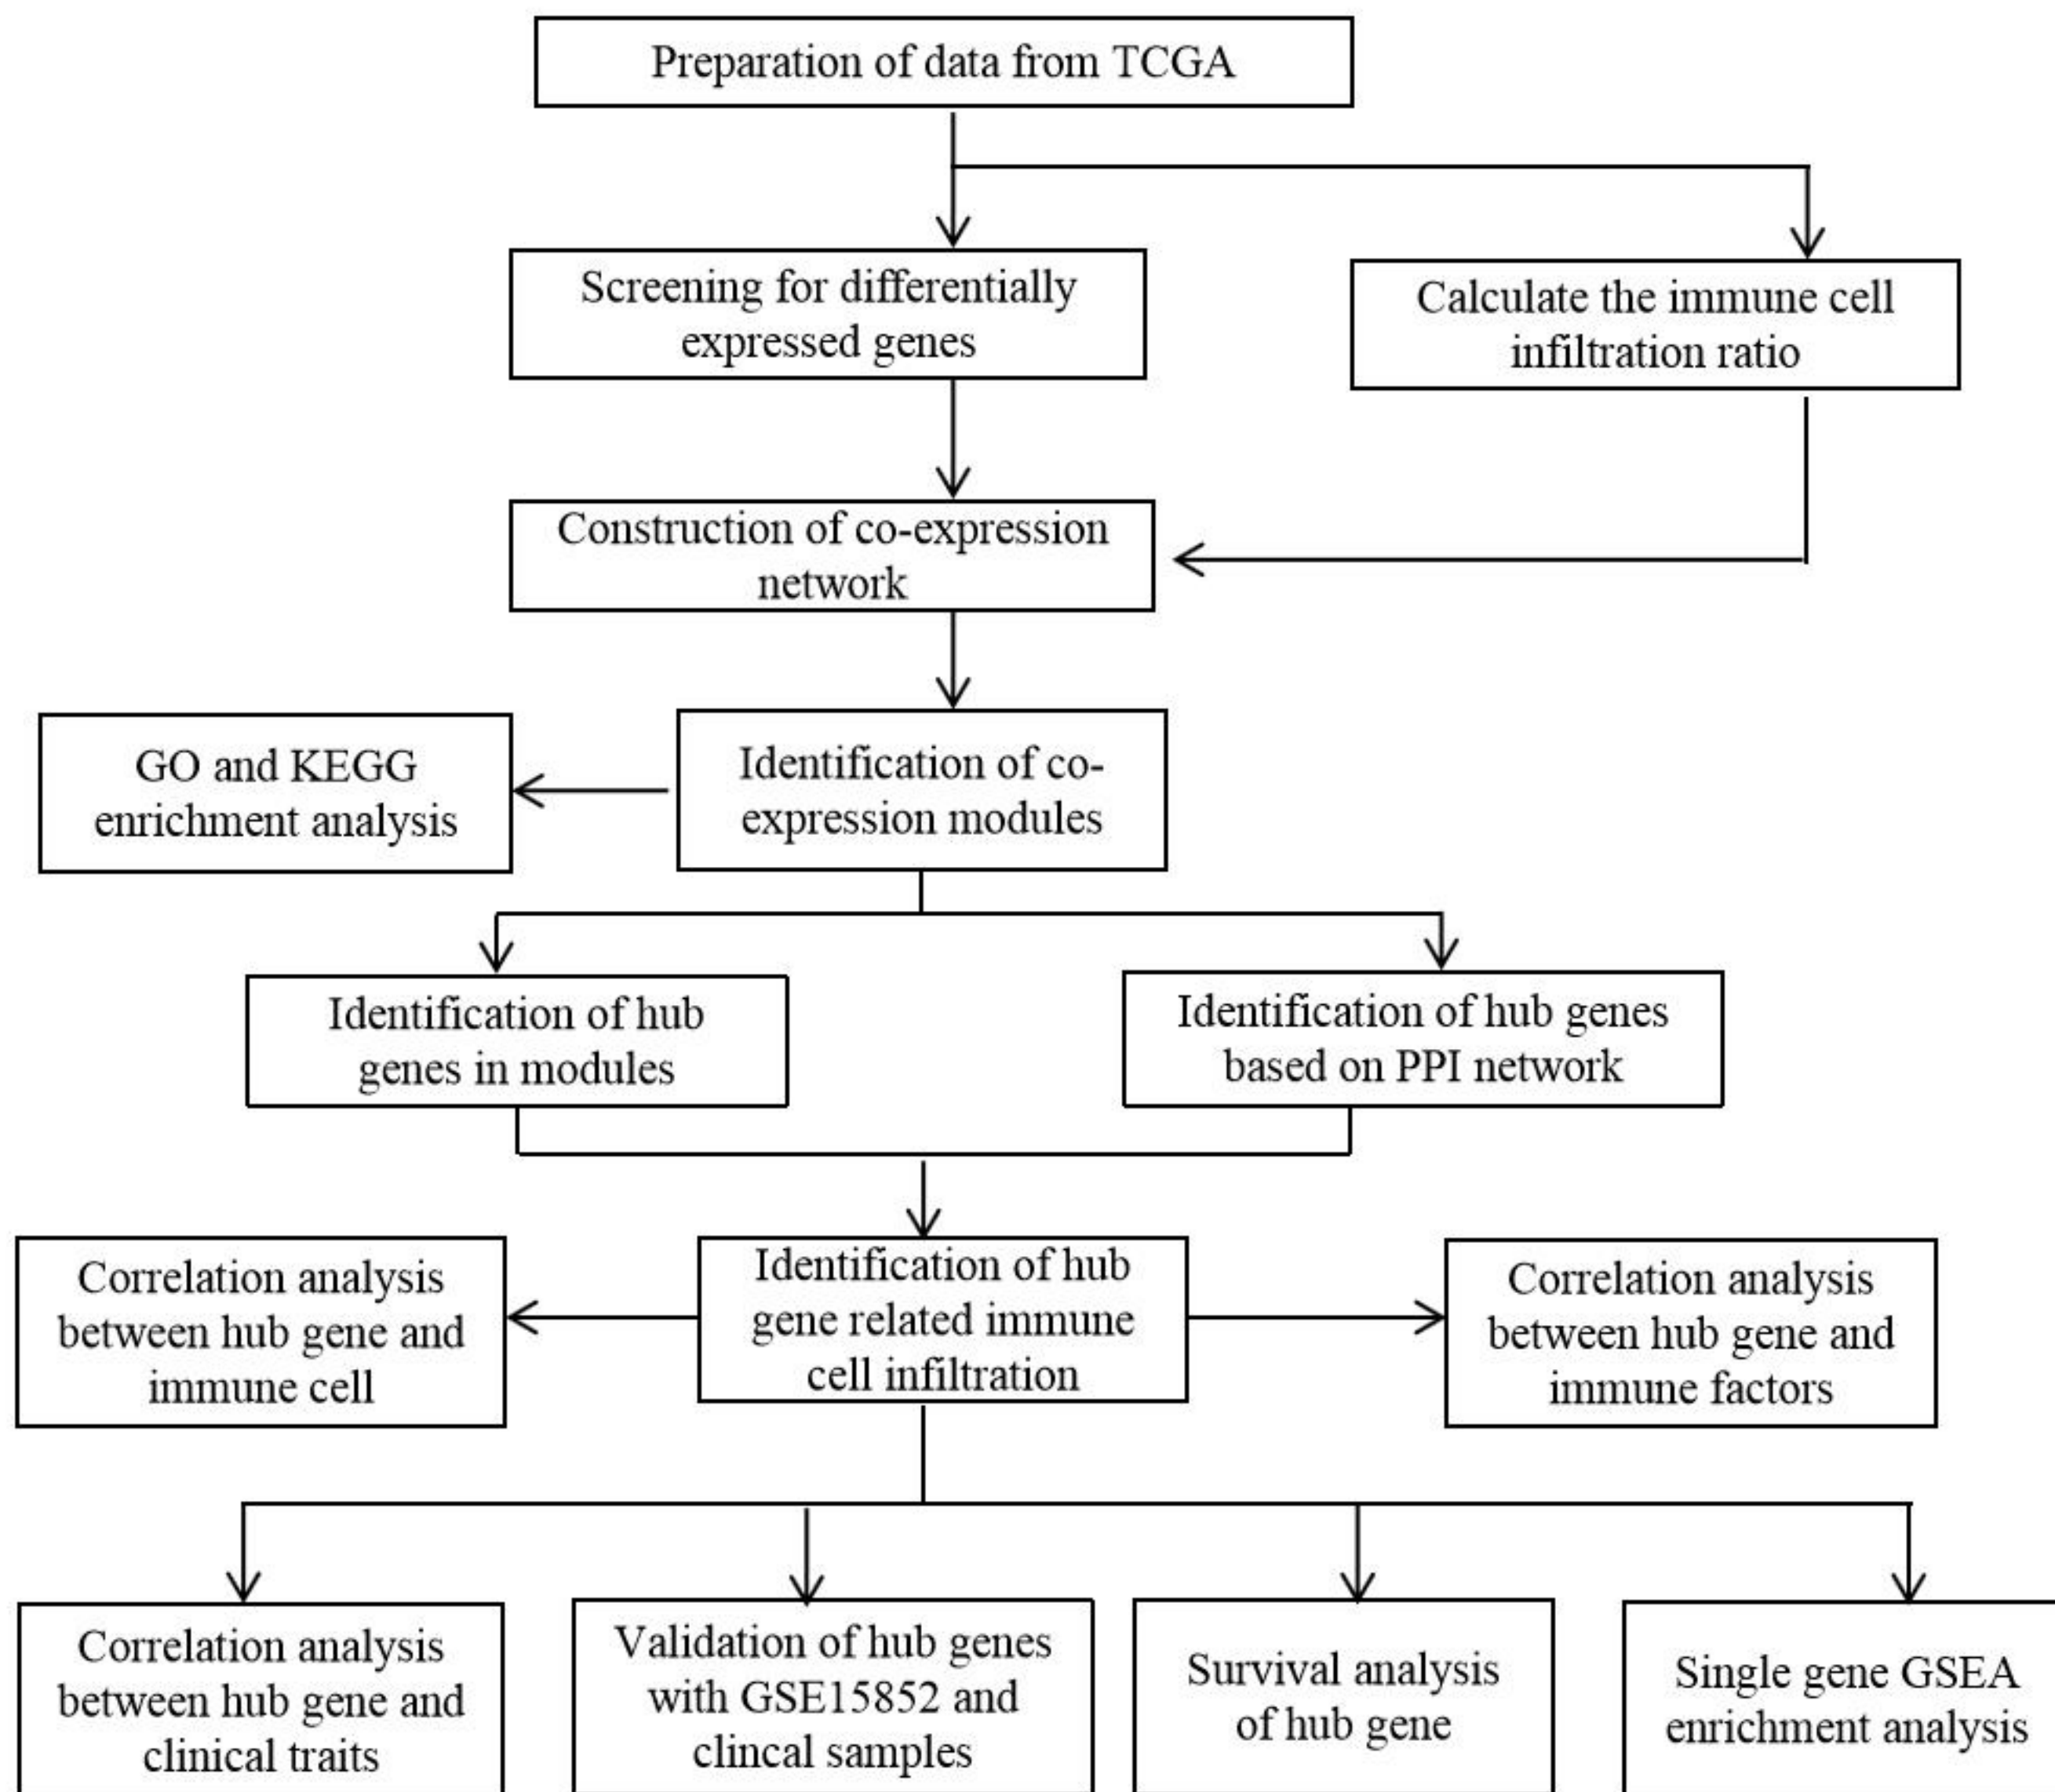

**Figure S1. The workflow of this study, including data preparation, processing, analysis, and validation.**



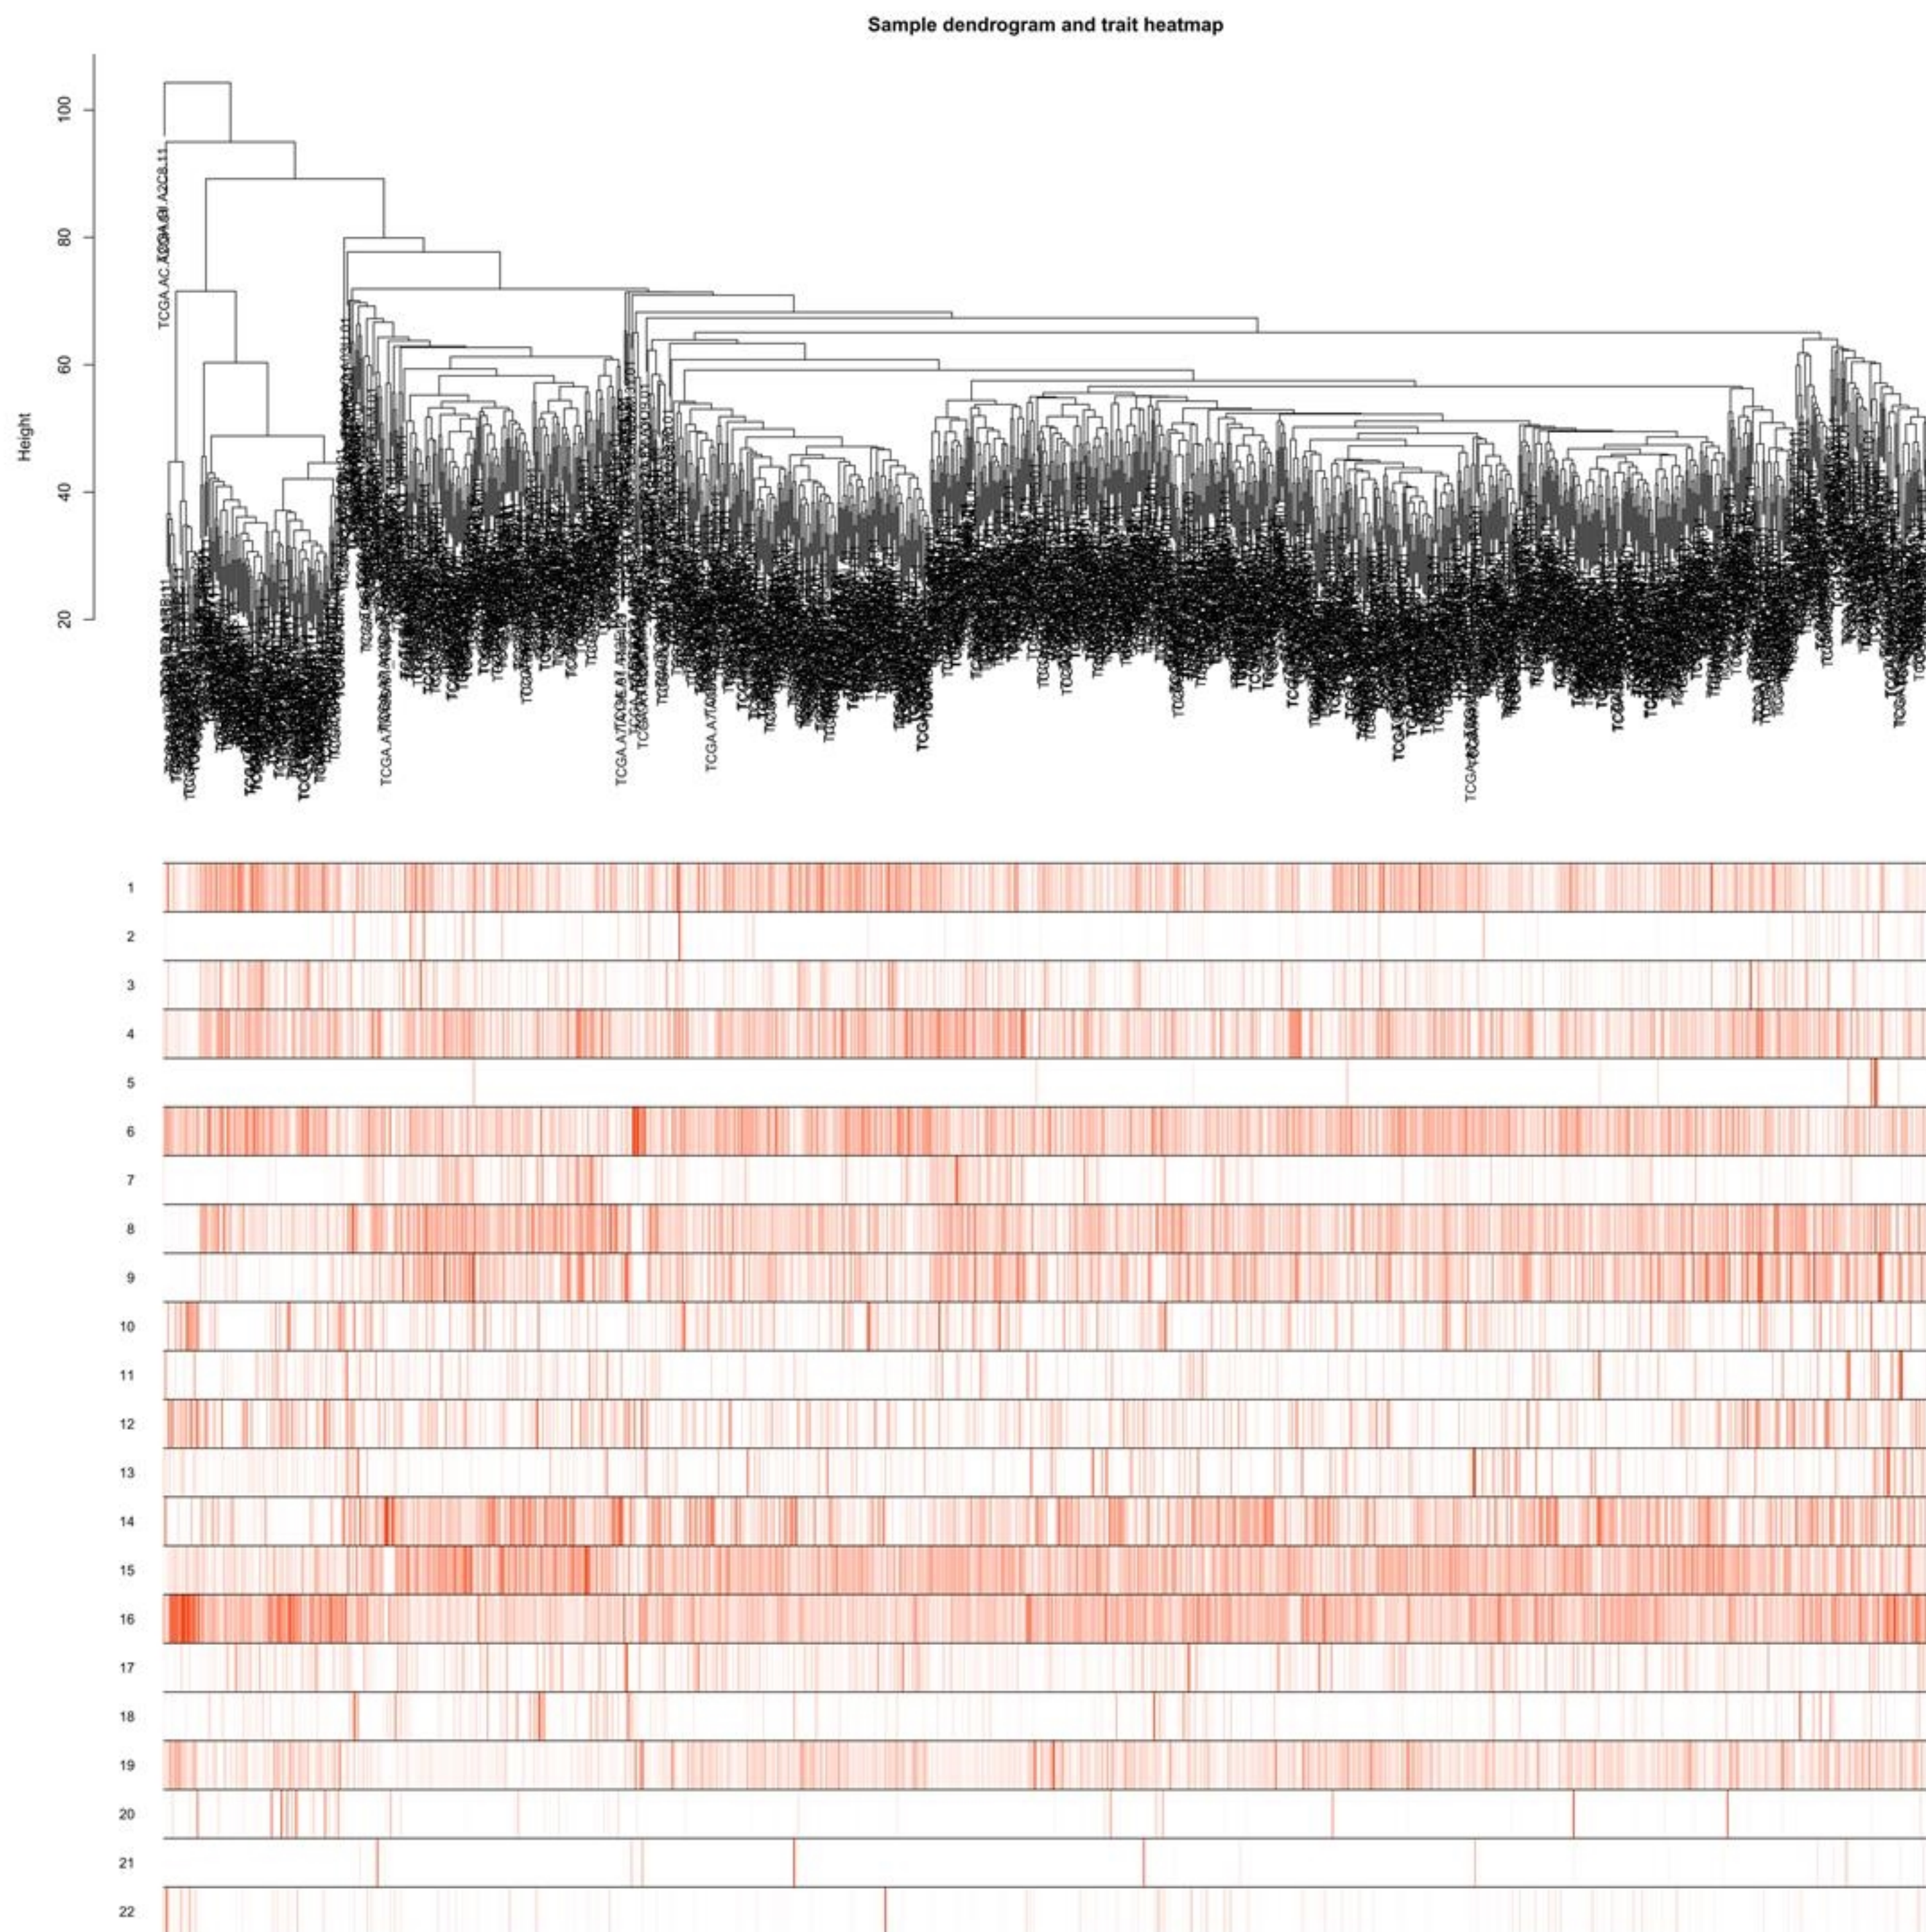

**Figure S2. Clustering of breast cancer samples. The darker the color in the heat map, the higher the degree of immune cell infiltration.**
